# Supplementary material for: Unravelling effectiveness of a nurse-led behaviour change intervention to enhance physical activity in patients at risk for cardiovascular disease in primary care: study protocol for a cluster randomised controlled trial
Source: Trials. 2017 Feb 22;18:79. doi: 10.1186/s13063-017-1823-9 (PMC5322635; doi:10.1186/s13063-017-1823-9)
Supplement: Additional file 3: — Results of the behavioural analysis in patients to increase the level of physical activity using the BCW. (PDF 251 kb) [file 13063_2017_1823_MOESM3_ESM.pdf]

| COM-B                    | TDF                                      | What needs to happen for patients to increase their level of physical activity*                                                                                                                                                                                                                                                                                                                                                                                                                                                                                                                                                                      | Intervention functions                             | BCTs                                                                                                                                                                           |
|--------------------------|------------------------------------------|------------------------------------------------------------------------------------------------------------------------------------------------------------------------------------------------------------------------------------------------------------------------------------------------------------------------------------------------------------------------------------------------------------------------------------------------------------------------------------------------------------------------------------------------------------------------------------------------------------------------------------------------------|----------------------------------------------------|--------------------------------------------------------------------------------------------------------------------------------------------------------------------------------|
| Physical capability      | Physical skills                          | <ul style="list-style-type: none"> <li>- Have the skills and physical capability to walk (1-13)</li> </ul>                                                                                                                                                                                                                                                                                                                                                                                                                                                                                                                                           | Training                                           | Feedback on behaviour, graded tasks, self-monitoring of behaviour                                                                                                              |
| Psychological capability | Knowledge                                | <ul style="list-style-type: none"> <li>- Have the knowledge and understanding of the influence of physical activity on the condition to reduce misperceptions and increase sense of urgency (8, 10, 14-20)</li> </ul>                                                                                                                                                                                                                                                                                                                                                                                                                                | Education                                          | Information about health consequences, feedback on behaviour                                                                                                                   |
|                          | Cognitive and interpersonal skills       | <ul style="list-style-type: none"> <li>- Have the skills to increase their level of physical activity (8, 10, 14-18)</li> <li>- Have the skills to deal with conflicting or confusing recommendations (7, 10, 11)</li> <li>- Have the skills to set goals, self-monitoring (e.g. wearing an accelerometer), and action planning (9, 19)</li> </ul>                                                                                                                                                                                                                                                                                                   | Training                                           | Feedback on behaviour, habit formation, graded tasks, self-monitoring                                                                                                          |
|                          | Memory, attention and decision processes | <ul style="list-style-type: none"> <li>- Notice and remember to be physical active, make everyday decisions to exercise according to an action plan (3, 21)</li> </ul>                                                                                                                                                                                                                                                                                                                                                                                                                                                                               | Training, environmental restructuring, enablement  | Feedback on behaviour, prompt and cues, habit formation                                                                                                                        |
|                          | Behavioural regulation                   | <ul style="list-style-type: none"> <li>- Concordance to self-monitoring (e.g. wearing an accelerometer), and action planning (9, 19)</li> <li>- Break well-established habits (6, 15)</li> <li>- Have triggers to prompt (rewards, supervision, mail) (2, 17, 18, 22)</li> </ul>                                                                                                                                                                                                                                                                                                                                                                     | Education, training, enablement                    | Self-monitoring of behaviour, habit formation, action planning, prompts and cues                                                                                               |
| Physical opportunity     | Environmental context and resources      | <ul style="list-style-type: none"> <li>- Have time to exercise (3, 6, 8, 9, 12, 13, 16, 18, 19)</li> <li>- Have good weather or good shoes and clothes for all weather types (2-4, 8, 12, 18)</li> <li>- Have alternatives to deal with bad weather, neighbour insecurities, transport problems (8, 18, 23)</li> <li>- Improve easy access to affordable and stimulating facilities (at home or in their neighbourhood) tailored to the patients' needs and preferences (1, 2, 4, 18)</li> <li>- Have a flexible routine allowing for an increase in walking (2, 9)</li> <li>- Have the opportunity to be physical active during work (9)</li> </ul> | Training, environmental restructuring, enablement  | Problem solving, feedback on behaviour, restructuring the physical environment, restructuring the social environment, social support (practical), self-monitoring of behaviour |
| Social opportunity       | Social influences                        | <ul style="list-style-type: none"> <li>- Have positive support from family, friends, caregivers, fellow patients (e.g. have a buddy to exercise with or a buddy that supports exercise) (4, 6, 8, 9, 11, 13, 16, 19-21, 23-25)</li> <li>- Have a collaborative relationship/ communication with caregiver (5, 8, 20, 23, 24)</li> <li>- Have a competent caregiver (knowledge, clear guidance and stimulation, supervision, tailored advice, addressing importance of physical activity) (1-3, 11, 12, 25)</li> <li>- Overcome culture and language barriers (16, 20)</li> <li>- Have role models (25)</li> </ul>                                    | Environmental restructuring, modelling, enablement | Social support (unspecified), problem solving, restructuring the social environment                                                                                            |

|                       |                                           |                                                                                                                                                                                                                                                                                                                                                                     |                                                    |                                                                                                                                                                                  |
|-----------------------|-------------------------------------------|---------------------------------------------------------------------------------------------------------------------------------------------------------------------------------------------------------------------------------------------------------------------------------------------------------------------------------------------------------------------|----------------------------------------------------|----------------------------------------------------------------------------------------------------------------------------------------------------------------------------------|
| Reflective motivation | Professional/<br>social role and identity | Not applicable                                                                                                                                                                                                                                                                                                                                                      | Not applicable                                     | Not applicable                                                                                                                                                                   |
|                       | Beliefs about capabilities                | <ul style="list-style-type: none"> <li>- Overcome personal struggles (anxiety in unfamiliar surrounds, negative, or depressive emotions, body images) (5, 13, 18, 19, 21)</li> <li>- Have insight in own behaviour (10)</li> <li>- Have appropriate self and external monitoring (e.g. must be challenging, improve self-efficacy, provide feedback) (9)</li> </ul> | Education, persuasion, enablement                  | Focus on past success, feedback on behaviour, self-monitoring of behaviour, problem solving, graded tasks, goal setting (behaviour), action planning, review behavioural goal(s) |
|                       | Optimism                                  | <ul style="list-style-type: none"> <li>- Cope with negative attitudes and experiences (10, 12, 26)</li> <li>- Experience health benefits of increasing their level of physical activity (3, 4, 9, 13, 18)</li> </ul>                                                                                                                                                | Education, persuasion                              | Focus on past success                                                                                                                                                            |
|                       | Beliefs about consequences                | <ul style="list-style-type: none"> <li>- Believe that exercise is good, and has positive influences on their condition (9, 13)</li> <li>- Believe that exercising helps to sleep well and lose weight (9)</li> <li>- Experience health benefits of increasing their level of physical activity (3, 4, 9, 13, 18)</li> </ul>                                         | Education, persuasion, modelling                   | Information about health consequences, feedback on behaviour                                                                                                                     |
|                       | Intentions                                | <ul style="list-style-type: none"> <li>- Motivated to change their physical activity level (2, 4, 6, 12, 15, 16, 18)</li> <li>- Feel they want to take responsibility to be physically active (26)</li> <li>- Feel the need/urgency to change their physical activity level (18)</li> <li>- Perceive health as priority (1, 26)</li> </ul>                          | Education, persuasion, incentivisation             | Commitment, feedback on behaviour                                                                                                                                                |
|                       | Goals                                     | <ul style="list-style-type: none"> <li>- Set achievable and personal goals (3)</li> <li>- Action planning (9)</li> <li>- Deal with conflicting goals (9)</li> </ul>                                                                                                                                                                                                 | Education, persuasion, incentivisation, enablement | Self-monitoring of behaviour, goal setting (behaviour), goal setting (outcome), action planning, review behavioural goal(s), problem solving, feedback on behaviour              |
| Automatic motivation  | Reinforcement                             | <ul style="list-style-type: none"> <li>- Have positive prompts and cues in environment (16)</li> <li>- Have routines and habits for daily exercising (6, 15)</li> </ul>                                                                                                                                                                                             | Training, environmental restructuring              | Prompts and cues, habit formation                                                                                                                                                |
|                       | Emotion                                   | <ul style="list-style-type: none"> <li>- Enjoy being physically active (4, 6, 9, 13, 18, 25)</li> </ul>                                                                                                                                                                                                                                                             | Incentivisation                                    | Feedback on behaviour                                                                                                                                                            |

\*Results of a review of qualitative studies

Abbreviations: BCTs: Behaviour Change Techniques; BCW: Behaviour Change Wheel; COM-B: Capability, Opportunity, Motivation, Behaviour; TDF: Theoretical Domains Framework

## References

1. Bethancourt HJ, Rosenberg DE, Beatty T, Arterburn DE. Barriers to and facilitators of physical activity program use among older adults. *Clin Med Res* [Internet]. 2014 Sep;12(1-2):10-20.
2. Casey D, De Civita M, Dasgupta K. Understanding physical activity facilitators and barriers during and following a supervised exercise programme in type 2 diabetes: A qualitative study. *Diabet Med* [Internet]. 2010 Jan;27(1):79-84.
3. Elley CR, Dean S, Kerse N. Physical activity promotion in general practice--patient attitudes. *Aust Fam Physician* [Internet]. 2007 Dec;36(12):1061-4.
4. Hartman JE, ten Hacken NH, Boezen HM, de Greef MH. Self-efficacy for physical activity and insight into its benefits are modifiable factors associated with physical activity in people with COPD: A mixed-methods study. *J Physiother* [Internet]. 2013 Jun;59(2):117-24.
5. Bayliss EA, Ellis JL, Steiner JF. Barriers to self-management and quality-of-life outcomes in seniors with multimorbidities. *Ann Fam Med* [Internet]. 2007 Sep-Oct;5(5):395-402.
6. Mancuso CA, Sayles W, Robbins L, Phillips EG, Ravenell K, Duffy C, Wenderoth S, Charlson ME. Barriers and facilitators to healthy physical activity in asthma patients. *J Asthma* [Internet]. 2006 Mar;43(2):137-43.
7. Rockwell JM, Riegel B. Predictors of self-care in persons with heart failure. *Heart Lung* [Internet]. 2001 Jan-Feb;30(1):18-25.
8. Albarran NB, Ballesteros MN, Morales GG, Ortega MI. Dietary behavior and type 2 diabetes care. *Patient Educ Couns* [Internet]. 2006 May;61(2):191-9.
9. Normansell R, Smith J, Victor C, Cook D, Kerry S, Iliffe S, Ussher M, Fox Rushby J, Whincup P, Harris T. Numbers are not the whole story: A qualitative exploration of barriers and facilitators to increased physical activity in a primary care based walking intervention. *BMC Public Health* [Internet]. 2014;14:1272-.
10. Jansink R, Braspenning J, van der Weijden T, Elwyn G, Grol R. Primary care nurses struggle with lifestyle counseling in diabetes care: A qualitative analysis. *BMC Fam Pract* [Internet]. 2010;11:41-.
11. Bratzke L, Muehrer R, Kehl K, Lee K, Ward E, Kwekkeboom K. Self-management priority setting and decision-making in adults with multimorbidity: A narrative review of literature. *Int J Nurs Stud* [Internet]. 2015;52(3):744-55.
12. Booth ML, Bauman A, Owen N, Gore CJ. Physical activity preferences, preferred sources of assistance, and perceived barriers to increased activity among physically inactive australians. *Prev Med* [Internet]. 1997 Jan-Feb;26(1):131-7.
13. De Bourdeaudhuij I, Sallis J. Relative contribution of psychosocial variables to the explanation of physical activity in three population-based adult samples. *Prev Med* [Internet]. 2002 Feb;34(2):279-88.
14. Jansink R, Braspenning J, Keizer E, van der Weijden T, Elwyn G, Grol R. Misperception of patients with type 2 diabetes about diet and physical activity, and its effects on readiness to change. *J Diabetes* [Internet]. 2012 Dec;4(4):417-23.

15. Booth AO, Lowis C, Dean M, Hunter SJ, McKinley MC. Diet and physical activity in the self-management of type 2 diabetes: Barriers and facilitators identified by patients and health professionals. *Prim Health Care Res Dev* [Internet]. 2013 Jul;14(3):293-306.
16. Fitzgerald N, Spaccarotella K. <br />Barriers to a healthy lifestyle: From individuals to public Policy—An ecological perspective *Journal of Extension*. 2009;47(1)
17. Schutzer KA, Graves BS. Barriers and motivations to exercise in older adults. *Prev Med* [Internet]. 2004 Nov;39(5):1056-61.
18. Lascar N, Kennedy A, Hancock B, Jenkins D, Andrews RC, Greenfield S, Narendran P. Attitudes and barriers to exercise in adults with type 1 diabetes (T1DM) and how best to address them: A qualitative study. *PLoS One* [Internet]. 2014 Sep 19;9(9):e108019.
19. Simmons D, Lillis S, Swan J, Haar J. Discordance in perceptions of barriers to diabetes care between patients and primary care and secondary care. *Diabetes Care* [Internet]. 2007;30(3):490-5.
20. Nam S, Chesla C, Stotts N, Kroon L, Janson S. Barriers to diabetes management: Patient and provider factors. *Diabetes Res Clin Pract* [Internet]. 2011;93(1):1-9.
21. Rockwell JM, Riegel B. Predictors of self-care in persons with heart failure. *Heart Lung* [Internet]. 2001 Jan-Feb;30(1):18-25.
22. Cable TA, Meland E, Soberg T, Slagsvold S. Lessons from the oslo study diet and anti-smoking trial: A qualitative study of long-term behaviour change. *Scand J Public Health* [Internet]. 1999 Sep;27(3):206-12.
23. Johnston S, Irving H, Mill K, Rowan M, Liddy C. The patient's voice: An exploratory study of the impact of a group self-management support program. *BMC Fam Pract* [Internet]. 2012;13:65-.
24. Nagelkerk J, Reick K, Meengs L. Perceived barriers and effective strategies to diabetes self-management. *J Adv Nurs* [Internet]. 2006 Apr;54(2):151-8.
25. Allender S, Cowburn G, Foster C. Understanding participation in sport and physical activity among children and adults: A review of qualitative studies. *Health Educ Res* [Internet]. 2006 Dec;21(6):826-35.
26. Coventry P, Fisher L, Kenning C, Bee P, Bower P. Capacity, responsibility, and motivation: A critical qualitative evaluation of patient and practitioner views about barriers to self-management in people with multimorbidity. *BMC Health Serv Res* [Internet]. 2014;14:536-.
